# Supplementary material for: The Impact of Structural Variation on Alzheimer’s Disease in the Alzheimer’s Disease Sequencing Project
Source: Research Square preprint supplement (doi:10.21203/rs.3.rs-8562759/v1), 2026-01-13
Supplement: Supplementary file 1 [file 67ae8d0086d3b8bef4330b90.xlsx]

## Sheet: Sup1
Supplemental Table 1. SVs mapped to AD genes
Gene_name	SVTYPE	CHROM	POS	SVLEN	AF	VEP Consequence
CR1	DEL	chr1	207581260	56	0.0122024	NMD_transcript_variant
PSEN2	INS	chr1	226903042	329	0.0121727	NMD_transcript_variant,non_coding_transcript_variant
INPP5D	DEL	chr2	233065583	67	0.0143994	non_coding_transcript_variant
INPP5D	DEL	chr2	233065586	65	0.673416	non_coding_transcript_variant
INPP5D	INS	chr2	233137902	196	0.0469984	non_coding_transcript_variant
INPP5D	INS	chr2	233137902	174	0.107209	non_coding_transcript_variant
INPP5D	DEL	chr2	233176498	107	0.0219999	non_coding_transcript_variant
INPP5D	INS	chr2	233176605	685	0.0357164	non_coding_transcript_variant
INPP5D	DEL	chr2	233180694	135	0.0653762	non_coding_transcript_variant
INPP5D	INS	chr2	233180874	135	0.0222374	non_coding_transcript_variant
WDR12	INS	chr2	202986885	60	0.229915	non_coding_transcript_variant
MME	DEL	chr3	155125282	58	0.0273737	non_coding_transcript_variant
IDUA	DEL	chr4	999927	87	0.0191794	non_coding_transcript_exon_variant,non_coding_transcript_variant
RASGEF1C	DEL	chr5	180101990	56	0.115759	NMD_transcript_variant,non_coding_transcript_variant
RASGEF1C	INS	chr5	180134843	268	0.0170417	NMD_transcript_variant,non_coding_transcript_variant
RASGEF1C	INS	chr5	180134843	136	0.0194169	NMD_transcript_variant,non_coding_transcript_variant
HLA-DQA1	DEL	chr6	32626255	93136	0.0339647	transcript_ablation
UMAD1	DEL	chr7	7678518	62	0.0104804	NMD_transcript_variant,non_coding_transcript_variant
UMAD1	INS	chr7	7678636	158	0.017873	NMD_transcript_variant,non_coding_transcript_variant
UMAD1	DEL	chr7	7678636	54	0.0102725	NMD_transcript_variant,non_coding_transcript_variant
UMAD1	INS	chr7	7718903	317	0.0146666	NMD_transcript_variant,non_coding_transcript_variant
ICA1	DEL	chr7	8152593	63	0.0141322	NMD_transcript_variant,non_coding_transcript_variant
ICA1	INS	chr7	8152653	96	0.0111039	NMD_transcript_variant,non_coding_transcript_variant
TMEM106B	DEL	chr7	12242076	322	0.497684	3_prime_UTR_variant
JAZF1	DEL	chr7	27909085	210	0.0159729	NMD_transcript_variant,non_coding_transcript_variant
JAZF1	INS	chr7	27980741	304	0.0110148	NMD_transcript_variant,non_coding_transcript_variant
JAZF1	DEL	chr7	28174680	364	0.397274	NMD_transcript_variant,non_coding_transcript_variant
PTK2B	DEL	chr8	27322794	89	0.0333709	non_coding_transcript_exon_variant
PTK2B	INS	chr8	27438461	542	0.764028	non_coding_transcript_variant
ANK3	INV	chr10	60432868	388	0.0465827	NMD_transcript_variant
ANK3	DEL	chr10	60226299	56	0.23134	NMD_transcript_variant
ANK3	INS	chr10	60226355	82	0.0346179	NMD_transcript_variant
ANK3	INS	chr10	60226355	123	0.0447717	NMD_transcript_variant
ANK3	INS	chr10	60226355	169	0.0136571	NMD_transcript_variant
ANK3	DEL	chr10	60226468	104	0.0149635	NMD_transcript_variant
ANK3	DEL	chr10	60226468	117	0.0368743	NMD_transcript_variant
ANK3	INS	chr10	60226553	58	0.0353898	NMD_transcript_variant
ANK3	INS	chr10	60226553	85	0.127843	NMD_transcript_variant
ANK3	INS	chr10	60365085	287	0.349534	NMD_transcript_variant
ANK3	INS	chr10	60545020	117	0.45695	NMD_transcript_variant,non_coding_transcript_variant
ANK3	INS	chr10	60545020	126	0.849445	NMD_transcript_variant,non_coding_transcript_variant
ANK3	DEL	chr10	60667488	1050	0.0154979	non_coding_transcript_variant
TSPAN14	DEL	chr10	80482349	449	0.0146072	non_coding_transcript_variant
BLNK	DEL	chr10	96232281	103	0.130188	NMD_transcript_variant,non_coding_transcript_variant
MS4A4A	INS	chr11	60206478	310	0.0303426	NMD_transcript_variant
EED	INS	chr11	86259222	319	0.150733	non_coding_transcript_variant
TPCN1	DEL	chr12	113245305	319	0.0934624	non_coding_transcript_variant
TPCN1	INS	chr12	113286416	68	0.0201294	NMD_transcript_variant,non_coding_transcript_variant
TPCN1	INS	chr12	113286416	102	0.070364	NMD_transcript_variant,non_coding_transcript_variant
SLC24A4	DEL	chr14	92488418	152	0.616917	non_coding_transcript_variant
RIN3	DEL	chr14	92547076	59	0.0906716	NMD_transcript_variant
RIN3	DEL	chr14	92547084	61	0.0107476	NMD_transcript_variant
RIN3	INS	chr14	92547134	64	0.0528472	NMD_transcript_variant
RIN3	INS	chr14	92639855	52	0.338519	NMD_transcript_variant,non_coding_transcript_variant
ADAM10	DEL	chr15	58620648	318	0.41105	NMD_transcript_variant,non_coding_transcript_variant
SNX1	INS	chr15	64118993	319	0.0105991	NMD_transcript_variant
PLCG2	DEL	chr16	81866384	284	0.0572413	NMD_transcript_variant,non_coding_transcript_variant
PLCG2	INS	chr16	81948148	59	0.0740455	NMD_transcript_variant,non_coding_transcript_variant
PRDM7	DEL	chr16	90064602	6137	0.0244047	splice_acceptor_variant,splice_donor_variant,splice_donor_5th_base_variant,splice_polypyrimidine_tract_variant,coding_sequence_variant,splice_acceptor_variant,splice_donor_variant,splice_donor_5th_base_variant,splice_polypyrimidine_tract_variant,coding_sequence_variant,3_prime_UTR_variant,NMD_transcript_variant,splice_acceptor_variant,splice_donor_variant,splice_donor_5th_base_variant,splice_poly…
WNT3	DEL	chr17	46811122	166	0.197643	non_coding_transcript_variant
ACE	INS	chr17	63488528	289	0.326317	NMD_transcript_variant,non_coding_transcript_variant
ABCA7	INS	chr19	1052625	174	0.010421	NMD_transcript_variant,non_coding_transcript_variant
RBCK1	INS	chr20	408028	51	0.0848228	non_coding_transcript_variant
RBCK1	INS	chr20	408028	56	0.271629	non_coding_transcript_variant
RBCK1	INS	chr20	408056	98	0.160739	5_prime_UTR_variant,NMD_transcript_variant,non_coding_transcript_variant
RBCK1	INS	chr20	420697	81	0.0123805	NMD_transcript_variant
APP	INV	chr21	26001852	532	0.973814	non_coding_transcript_variant
APP	DEL	chr21	26022830	72	0.199721	non_coding_transcript_variant
APP	INS	chr21	26136201	66	0.0575678	non_coding_transcript_variant

## Sheet: Sup2
Supplemental Table 2. Descriptive statistics of 11,890 ADSP participants
	AD case (N= 5,585)	AD control (N= 6,305)
Sex
Female	3,425 (61.3%)	4,272 (67.8%)
Age
mean (SD)	75.16 (10.39)	77.34 (7.97)
Ancestry
AFR	1369	2002
EUR	3649	2678
LAT	530	1596
others	37	29

## Sheet: Sup3
Supplemental Table 3. EUR-specific SVs in LD with SNVs tagging AD known loci (R2 > 0.4)
SV TYPE	CHR	SV POS	SV length	AD SNP ID	AD gene	SV freq	SV N	SNP freq	SNP N	R2	SV beta	SNP beta	SV pval	SNP pval	Adjusted	Adjusted SNP pval
															SV pval
DEL	2	53260739	104	chr2:53254996:A:G	AC010967.2/SCARNA16	0.026	6327	0.024	6280	0.99	0	-0.012	0.997	0.925	0.197	0.942
DEL	2	105731354	5510	chr2:105618971:A:C	NCK2	0.007	6327	0.006	6327	0.63	0.342	0.461	0.119	0.055	0.975	0.186
				chr2:105749599:T:C	NCK2			0.008	6325	0.95		0.347		0.104	0.489	0.309
DEL	3	104697473	122	chr3:104690364:A:C	ALCAM	0.633	6327	0.641	6324	0.96	0.069	0.064	0.067	0.096	0.439	0.768
DEL	7	12242077	322	chr7:12229967:C:A	TMEM106B	0.42	6327	0.421	6322	0.96	0.011	0.011	0.76	0.78	0.846	0.672
				chr7:12229132:A:C	TMEM106B			0.424	6325	0.96		0.007		0.855	0.666	0.928
DEL	12	113245306	319	chr12:113281983:T:C	TPCN1	0.069	6327	0.07	6287	0.97	0.112	0.118	0.125	0.107	0.992	0.656
INS		113286417	102			0.068	6327			0.93	0.138		0.059		0.218	0.411
DEL		113300069	68			0.056	6327			0.77	0.174		0.03		0.122	0.592
DEL	17	46146541	314	chr17:46779275:G:C	WNT3/MAPT	0.224	6327	0.786	6327	0.78	-0.073	0.058	0.095	0.201	0.338	0.674
DEL	17	63086774	67	chr17:63460787:G:A	ACE	0.027	6327	0.018	6304	0.56	0.052	0.178	0.652	0.206	0.561	0.232

## Sheet: Sup4
Supplemental Table 4. AFR-specific SVs in LD with SNVs tagging AD known loci (R2 > 0.4)
SV TYPE	CHR	SV POS	SV length	AD SNP ID	AD gene	SV freq	SV N	SNP freq	SNP N	R2	SV beta	SNP beta	SV pval	SNP pval	Adjusted	Adjusted SNP pval
															SV pval
DEL	2	53260739	104	chr2:53254996:A:G	AC010967.2/SCARNA16	0.124	3371	0.097	3276	0.45	0.044	0.074	0.564	0.398	0.945	0.486
DEL	3	104697473	122	chr3:104690364:A:C	ALCAM	0.795	3371	0.661	3366	0.466	0.147	0.142	0.018	0.009	0.484	0.173
DEL	7	12242077	322	chr7:12229132:A:C	TMEM106B	0.693	3371	0.653	3354	0.794	0.074	0.071	0.184	0.191	0.945	0.699
				chr7:12229967:C:A	TMEM106B			0.696	3368	0.679		0.1		0.076	0.737	0.202
DEL	12	113245306	319	chr12:113281983:T:C	TPCN1	0.16	3371	0.163	3323	0.972	-0.074	-0.076	0.287	0.282	0.723	0.934
INS	14	52837363	56	chr14:52832135:A:G	FERMT2	0.552	3371	0.635	3366	0.612	-0.077	-0.07	0.14	0.19	0.641	0.556

## Sheet: Sup5
Supplemental Table 5. LAT-specific SVs in LD with SNVs tagging AD known loci (R2 > 0.4)
SV TYPE	CHR	SV POS	SV length	AD SNP ID	AD gene	SV freq	SV N	SNP freq	SNP N	R2	SV beta	SNP beta	SV Pval	SNP Pval	Adjusted	Adjusted SNP Pval
															SV Pval
DEL	2	53260739	104	chr2:53254996:A:G	AC010967.2/SCARNA16	0.046	2126	0.042	2098	0.666	0.158	0.029	0.381	0.877	0.225	0.302
DEL	3	104697473	122	chr3:104690364:A:C	ALCAM	0.675	2126	0.647	2125	0.837	0.036	0.018	0.67	0.826	0.884	0.95
DEL	7	12242077	322	chr7:12229132:A:C	TMEM106B	0.519	2126	0.512	2124	0.901	-0.14	-0.103	0.078	0.198	0.162	0.392
				chr7:12229967:C:A	TMEM106B			0.524	2126	0.895	-0.14	-0.123		0.126	0.5	0.95
DEL	12	113245306	319	chr12:113281983:T:C	TPCN1	0.102	2126	0.105	2106	0.966	0.101	0.112	0.452	0.406	0.601	0.746
INS		113286417	102			0.079	2126			0.691	0.038		0.797		0.394	0.271
DEL		113300069	68			0.058	2126			0.493	0.023		0.892		0.512	0.308
DEL	17	46146541	314	chr17:46779275:G:C	WNT3/MAPT	0.183	2126	0.801	2125	0.677	-0.131	0.271	0.204	0.008	0.123	0.006
DEL	17	63086774	67	chr17:63460787:G:A	ACE	0.027	2126	0.012	2125	0.426	-0.093	-0.095	0.713	0.796	0.791	0.998
INS	14	52837363	56	chr14:52832135:A:G	FERMT2	0.817	2126	0.855	2126	0.719	-0.133	-0.179	0.183	0.106	0.931	0.308

## Sheet: Sup6
Supplemental Table 6. Number of SVs with MAF > 0.5% and in HWE in each ancestry group
	DEL	INS	INV	TOTAL
AFR	21453	7383	106	28942
EUR	11391	3190	75	14656
LAT	22818	7478	98	30394
AFR: African ancestry group
EUR: European ancestry group
LAT: Latin ancestry group

## Sheet: Sup7
Supplemental Table 7. Coding SVs in PSEN1 among LAT group
	#CHROM	SV breakpoints	Gene	Length	Pathogenicity type	Pathogenicity score	ALT_CTS	OBS_CT	ALL_FREQ	CASE_CT	CASE_FREQ	CONTROL_CT	CONTROL_FREQ
DEL	14	72986817-72991680	ZFYVE1	-4864	Indirect; Regulatory	0.86	2	4252	0.00047	0	0	2	1
DEL	14	73857178-73861176	PTGR2	-3999	Direct; Regulatory	0.86	5	4252	0.00118	1	0.2	4	0.8
INS	14	73121947-73122144	RBM25	198	Indirect; Regulatory	0.87	30	4252	0.00706	6	0.2	24	0.8
INS	14	73787220-73787317	ELMSAN1	98	Indirect; Regulatory	0.9	1	4252	0.000235	0	0	1	1
ALT_CT: count of alternatvie allele observed in total samples
OBS_CT: total number of oberved allele
CASE_CT: count of alternative allele observed in AD cases
CASE_FREQ: frequency of alternative allele observed in AD cases
CONTROL_CT: count of alternative allele observed in AD controls
CONTROL_FREQ: frequency of alternative allele observed in AD controls

## Sheet: Sup8
Supplemental Table 8. Sensitivity analyses showing known AD genes with evidence of association with AD
A. Secondary coding variant analyses
Group	Gene	Pvalue	N variants	cMAC	SNV/INDELs Category	FDR Q value	Adjusted Pvalue
LAT	PSEN1	1.96e-07	11	61	pLof + disruptive missense	2.94e-06	0.003
LAT	PSEN1	1.96e-07	11	61	disruptive missense	2.94e-06	0.003
LAT	PSEN1	8.69e-07	14	74	missense	1.3e-05	0.001
EUR	TREM2	0.000373	27	180	missense	0.00559	NA
EUR	ABCA7	0.00101	110	320	pLof + disruptive missense	0.0152	NA
EUR	ABCA7	0.00147	95	278	disruptive missense	0.022	NA
AFR	ABCA7	0.00245	100	309	disruptive missense	0.0368	0.004
B. Secondary noncoding variant analyses
Group	Gene	Pvalue	N variants	cMAC	SNV/INDELs Category	FDR Q value	Adjusted Pvalue
EUR	TREM2	0.000216	11	107	Enhancer (CAGE)	0.00324	0.3
EUR	TREM2	0.000521	14	131	Promoter (CAGE)	0.0073	0.051
EUR	TREM2	0.000499	65	553	Promoter (DHS)	0.00749	0.07
EUR	TREM2	0.000698	64	430	Enhancer (DHS)	0.0105	0.07
LAT	ABI3	0.0028	27	110	Promoter (DHS)	0.0392	NA
NA: no SV present
cMAC: cumulative minor allele count
pLof: putative loss of function
CAGE: cap analysis of gene expression
DHS: DNase I hypersensitive site
FDR: false discovery rate
