# Supplementary material for: The Impact of Structural Variation on Alzheimer’s Disease in the Alzheimer’s Disease Sequencing Project
Source: Research Square preprint supplement (doi:10.21203/rs.3.rs-8562759/v1), 2026-01-13
Supplement: Supplementary file 2 [file 6abfcb60d53ac9f7fd94bed7.docx]

Supplementary Figure 1. Replicates variants quality score distributions


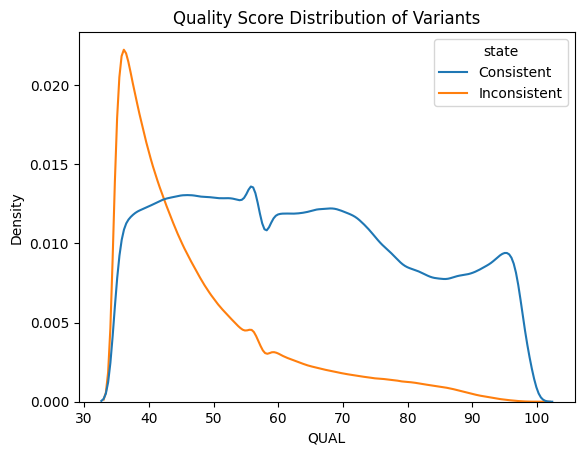


Supplementary Figure 2. Principal component analysis of SVs indicating a potential batch effect from read length


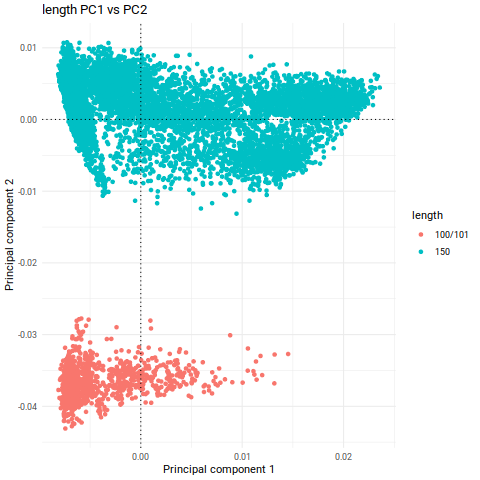


PC1 vs PC2


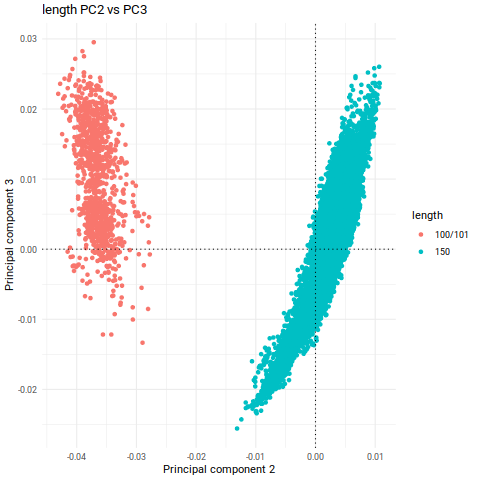


PC2 vs PC3

Supplementary Figure 3. PCA similarities between SVs and SNVs


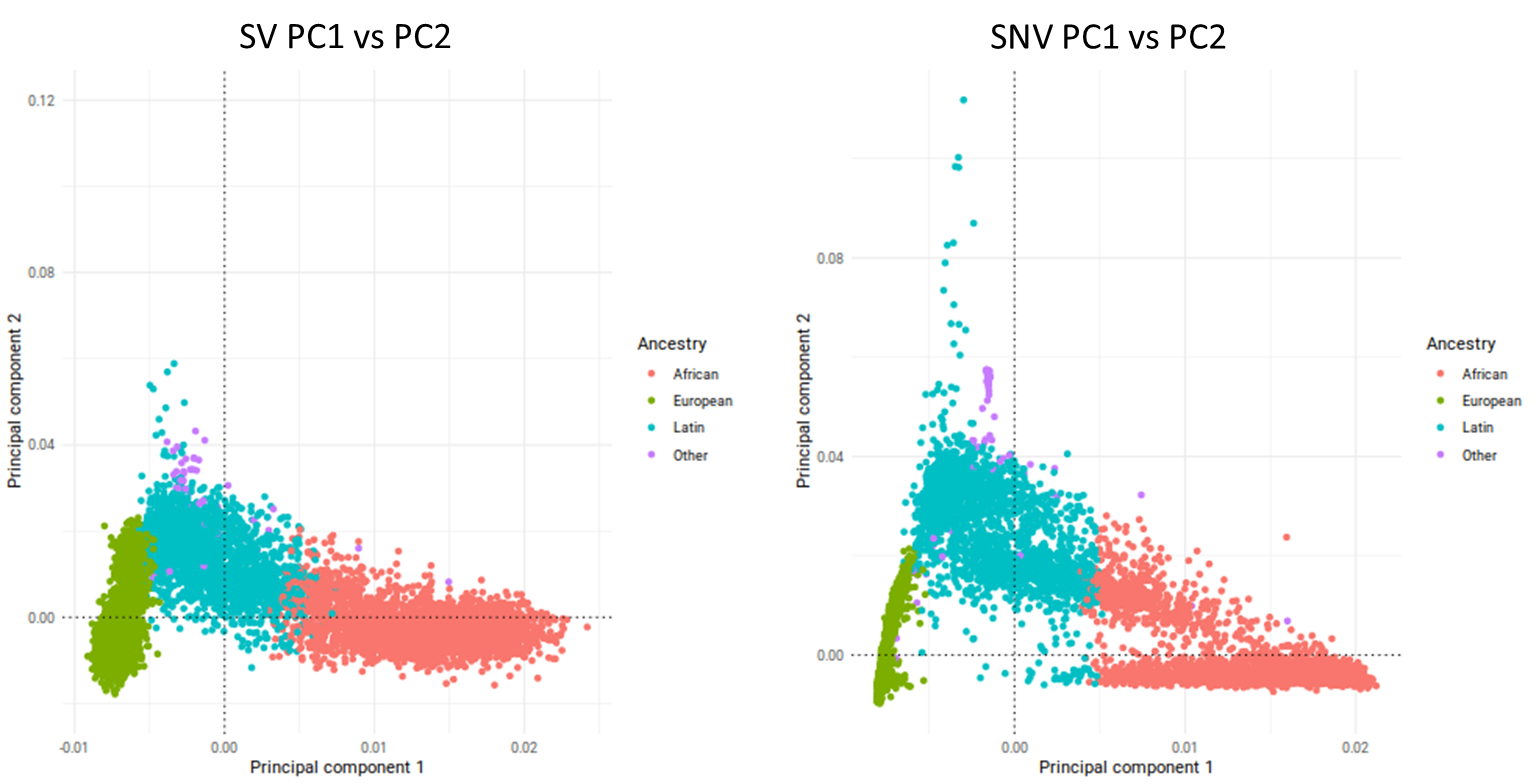


Supplementary Figure 4. Global ancestry inference using GrafPop


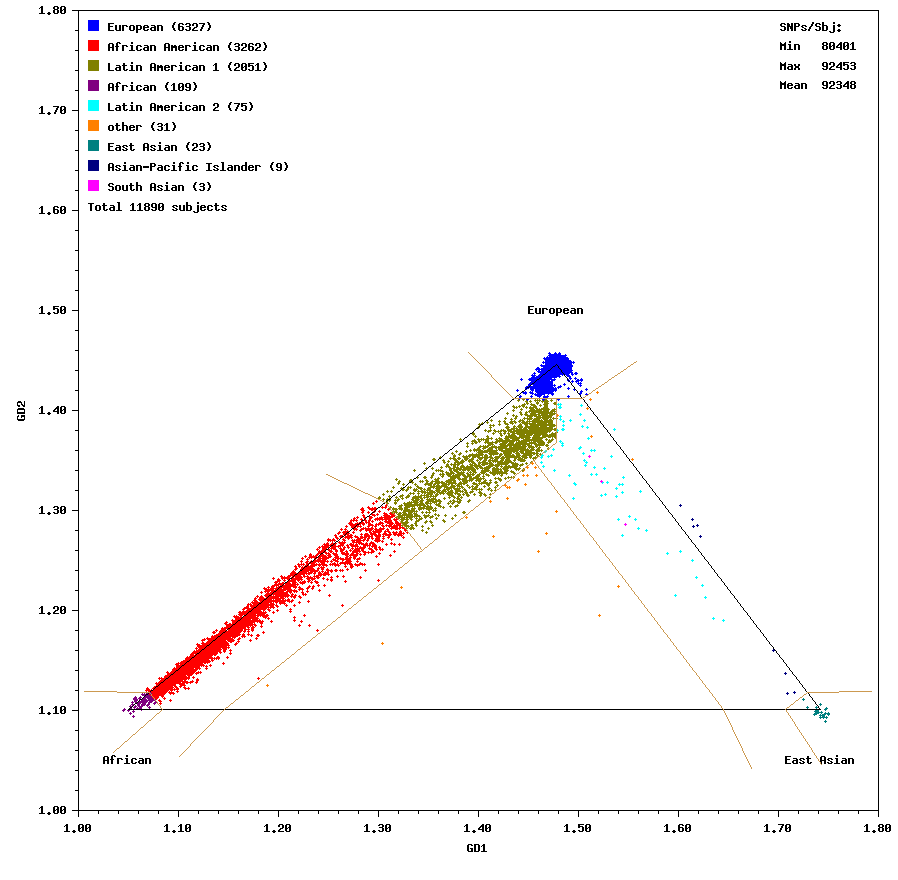


Supplementary Figure 5. Haplotype estimation of *TPCN* locus in EUR and LAT group


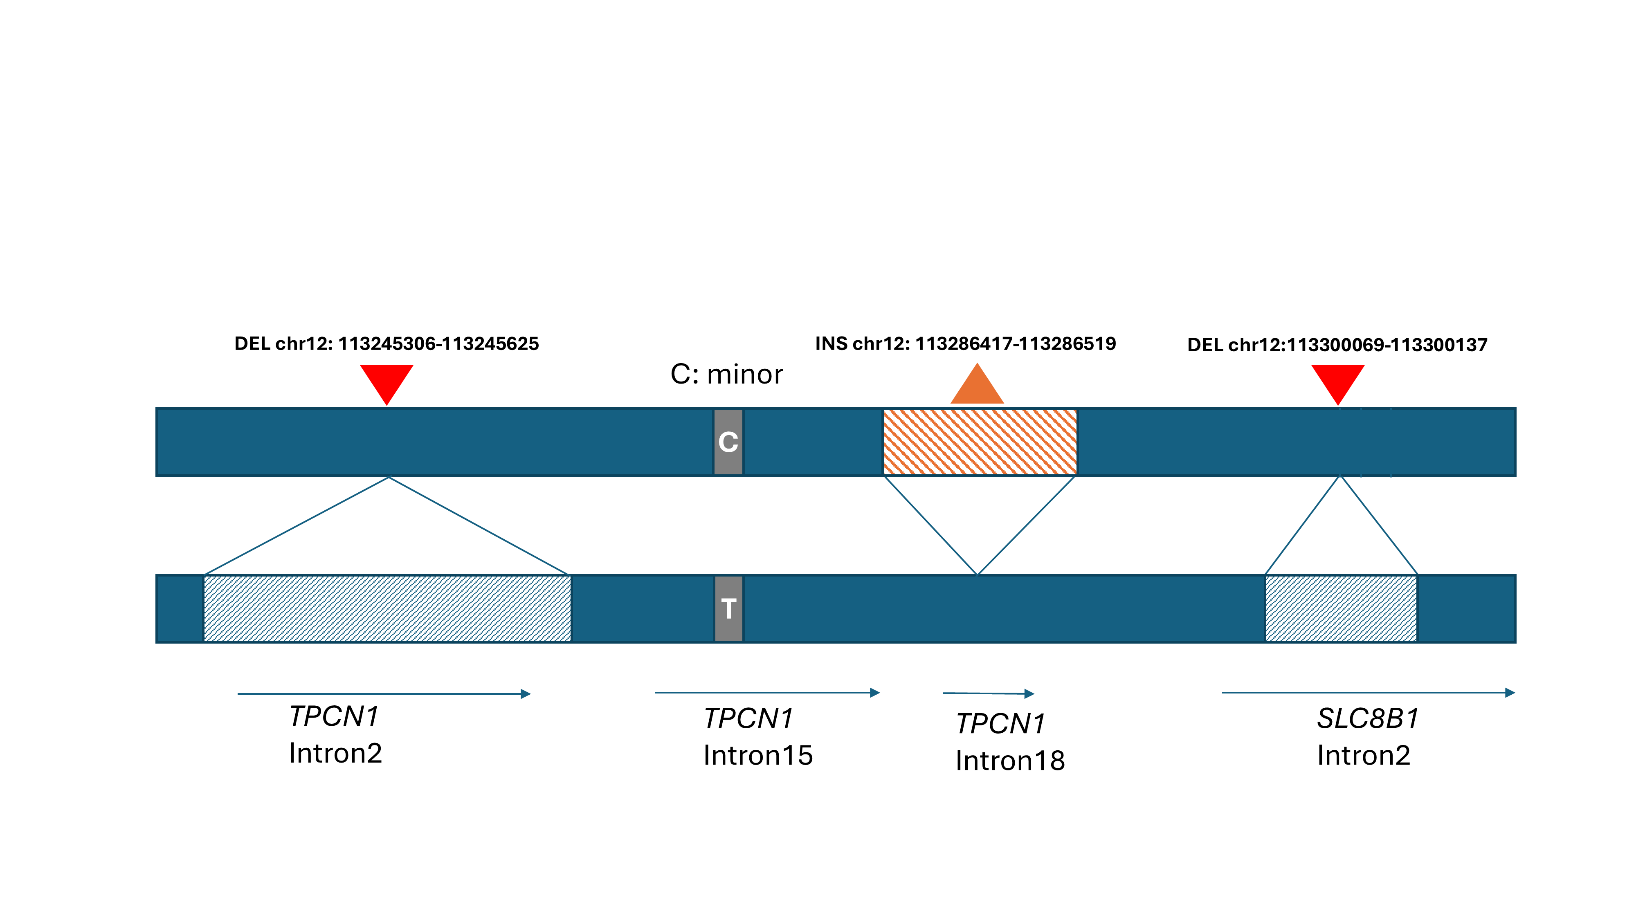


Supplementary Figure 6. Ancestry-specific GWAS and meta-analyses of common or low-frequency SVs


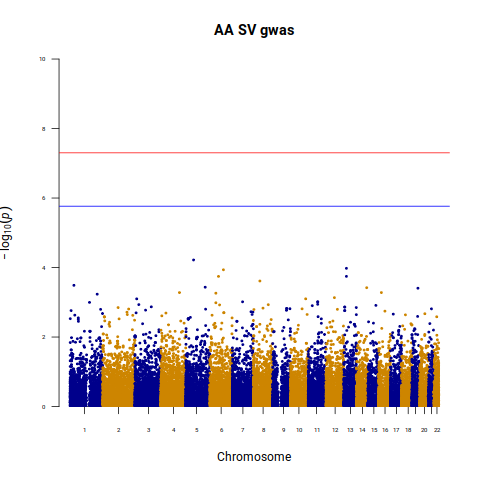

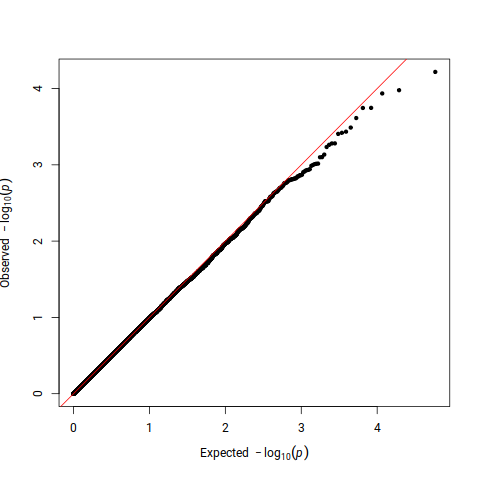


AFR


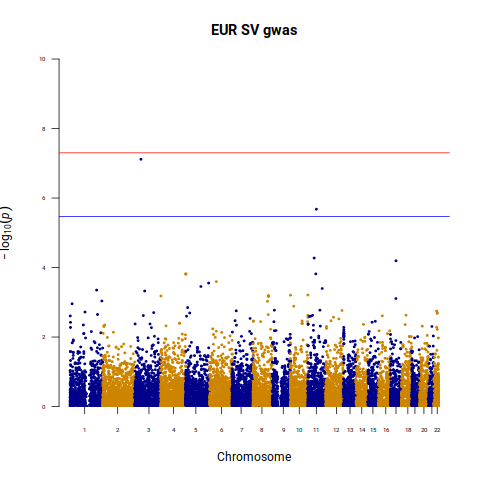

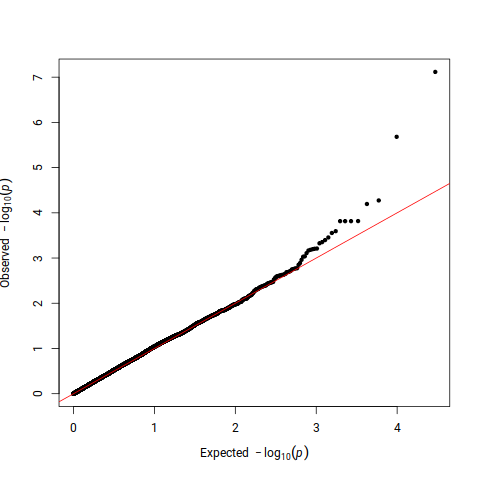


EUR


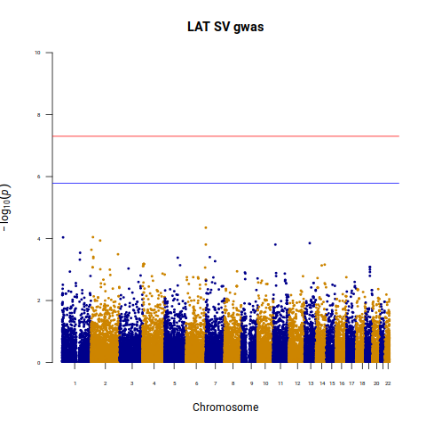

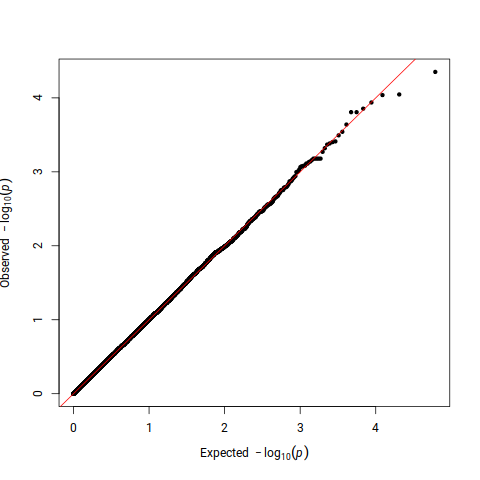


LAT


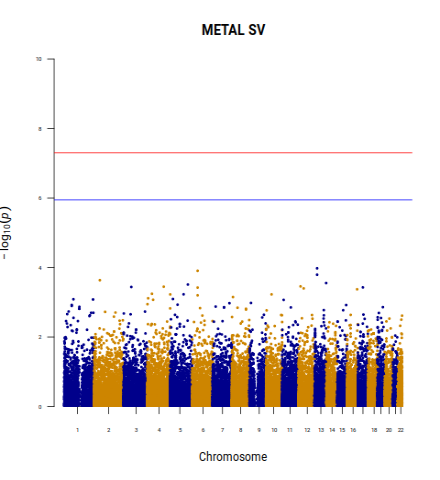

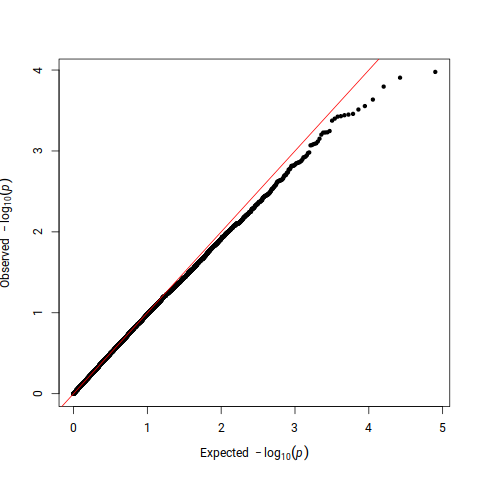


META analysis

Supplementary Figure 7. Primary gene-based association analyses of coding SVs


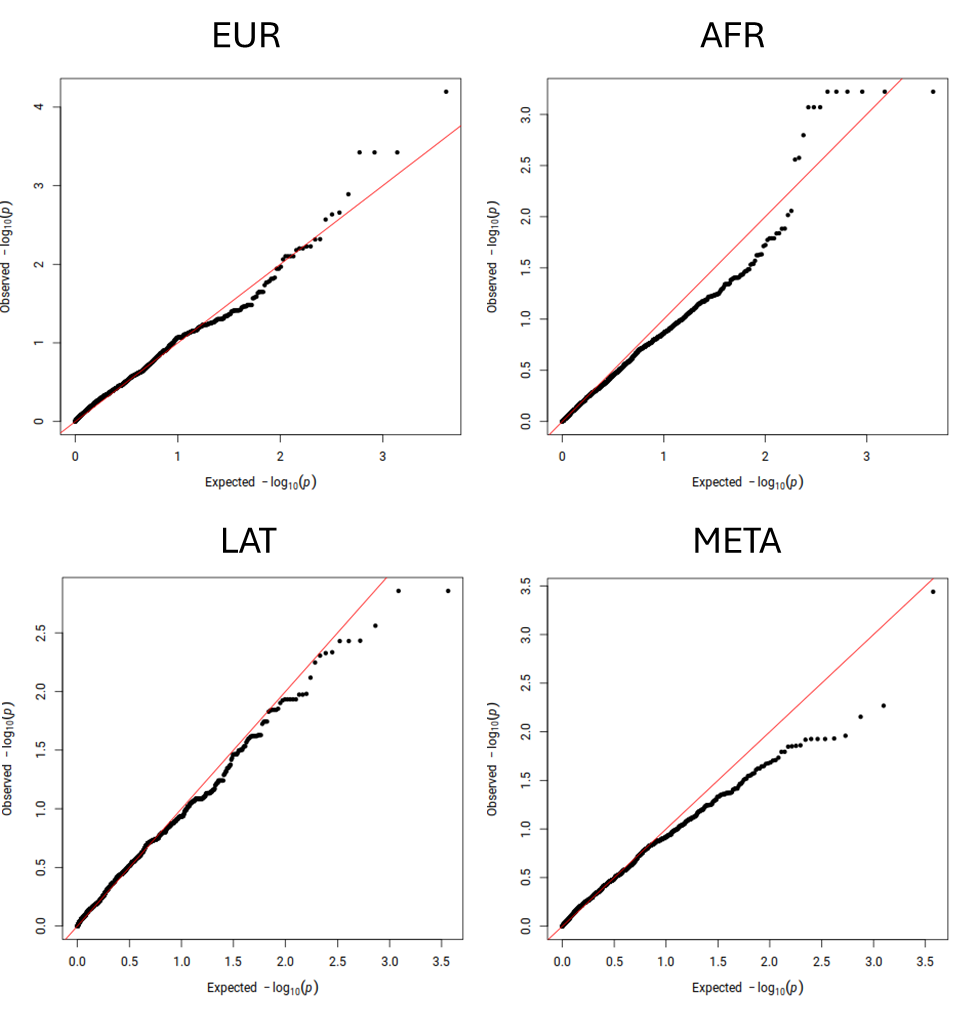


Supplementary Figure 8. Primary gene-based association analyses of noncoding SVs


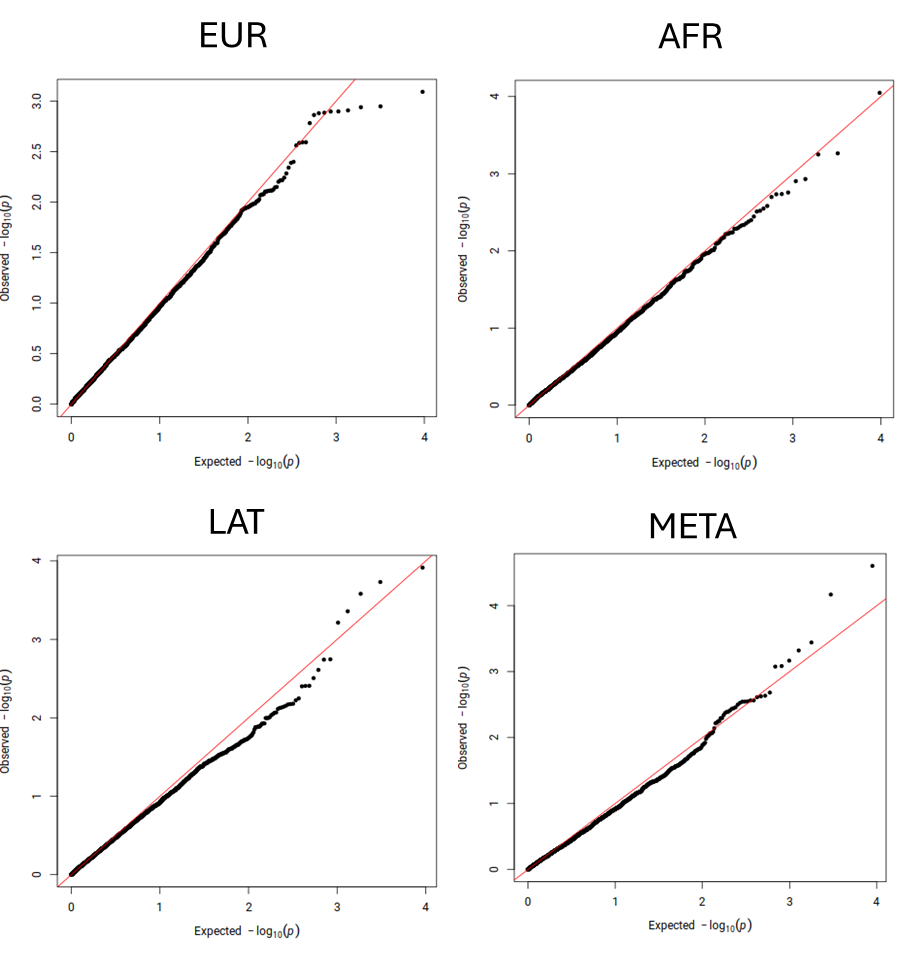


Supplementary Figure 9. Secondary gene-based association analyses of coding SNVs/INDELs and SVs


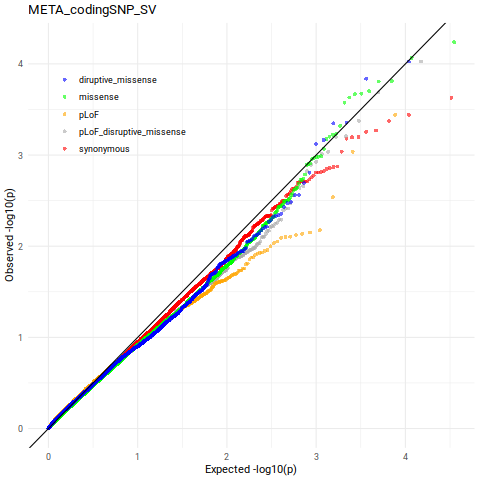

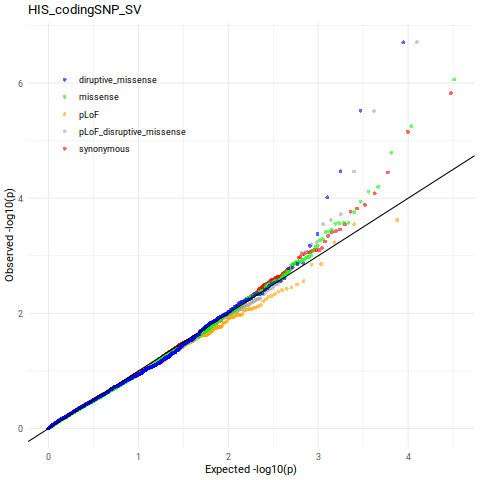

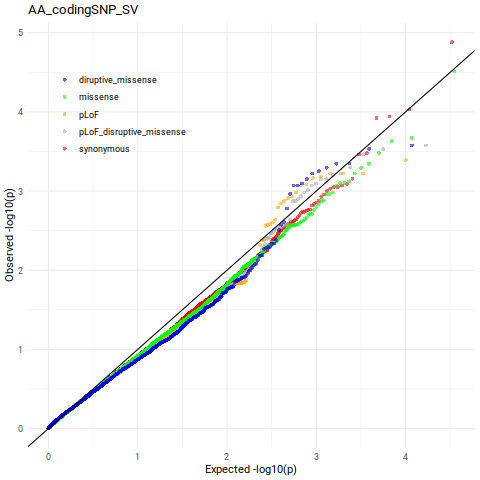

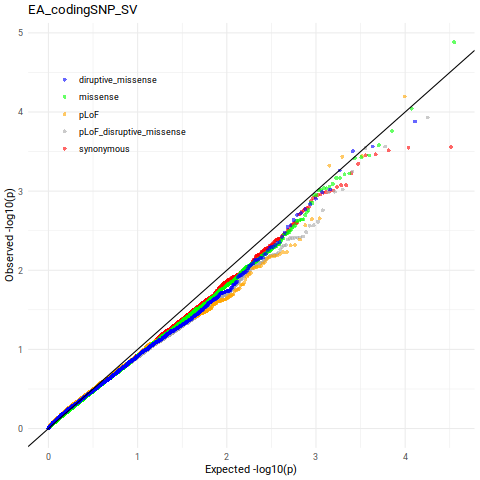


EUR

AFR

LAT

META

Supplementary Figure 10. Secondary gene-based association analyses of non-coding SNVs/INDELs and SVs


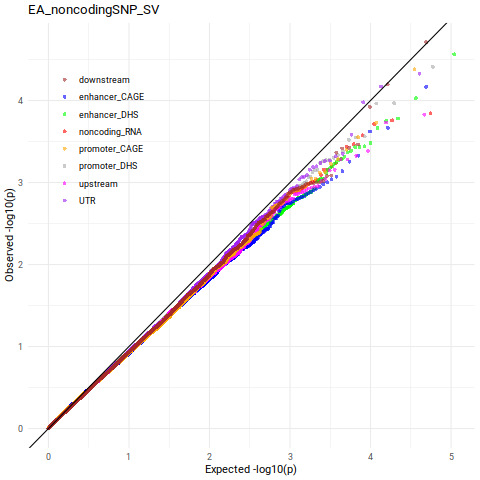

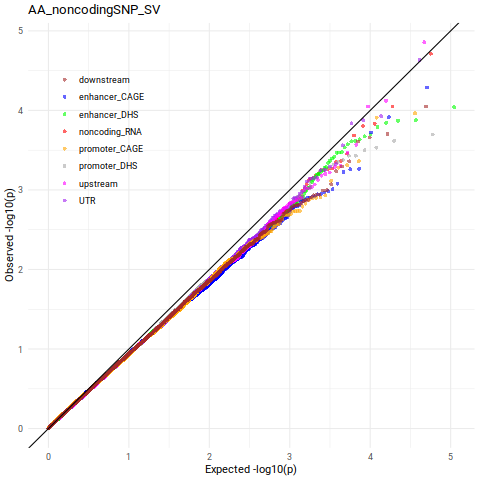

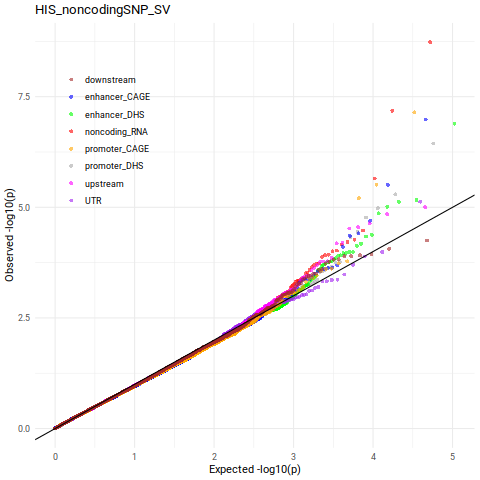

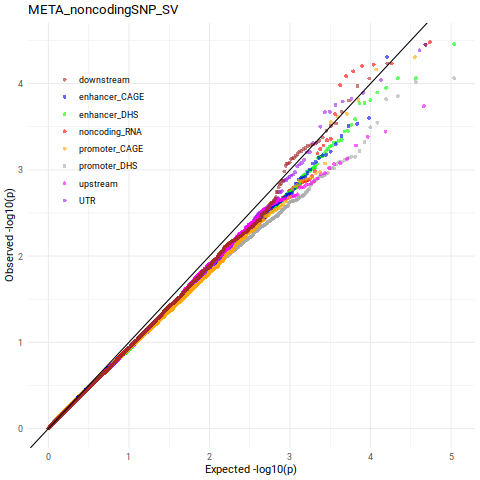


AFR

META

LAT

EUR
